# Supplementary material
Source: Preprints.org preprint supplement (doi:10.20944/preprints202008.0497.v1)
Supplement: Supplementary file 1 [file SI Table 1 v2.docx]

## **Supplementary Table 1.** List of agronomic management tasks and activities currently available in AgroTutor.

| 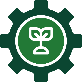 | Application of soil amendments | Organic fertilizer |
| --- | --- | --- |
| Lime application |
| Residues management |
| Other soil amendments |
| 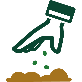 | Sowing | Conventional sowing |
| Cover crop added |
| High value crop added |
| New crop added |
| Other sowing |
| 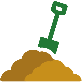 | Land preparation | Contour lines setting |
| Plot leveling |
| Soil leveling |
| Agricultural implements (e.g. discs) for conservation agriculture |
| Fertilizer for conservation agriculture |
| Soil de-compacting |
| Reshaping of permanent beds |
| Use of multi crop machinery |
| Other soil preparation activity |
| 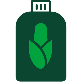 | Fertilization | Soil fertility analysis |
| Tissue analysis |
| Rich band |
| GreenSeeker |
| GreenSat |
| Fertility - Other |
| Inorganic fertilizer: manually buried |
| Inorganic fertilizer: mechanically buried |
| Inorganic fertilizer: buried with animal traction |
| Inorganic fertilizer: Superficial application |
| Inorganic fertilizer: foliar application |
| Inorganic fertilizer: application with irrigation |
| Biofertilizer: manually buried |
| Biofertilizer: mechanically buried |
| Biofertilizer: buried with animal traction |
| Biofertilizer: superficial application |
| Biofertilizer: foliar application |
| Biofertilizer: application with irrigation |
| Other fertilization activity |
| 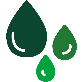 | Irrigation | Sprinkler irrigation |
| Drip irrigation |
| Follow irrigation |
| Other type of irrigation |
| 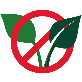 | Weed control | Pre-sowing herbicide |
| Post-sowing herbicides |
| Manual control of weeds |
| Other weed control activity |
| 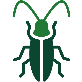 | Pest control | Fungicide |
| Pesticide |
| Pest control with pheromones |
| Natural enemies |
| Field pest monitoring |
| Seed treatment (fungicide, insecticide, mycorrhiza) |
| Other pest/disease control |
| 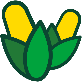 | Harvest | Manual |
| Mechanic |
| Other type of harvesting |
| 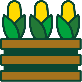 | Post-harvest storage | Traditional storage |
| Airtight containers |
| Pest control with pheromones |
| Grain drying |
| Lime |
| Diatomaceous earth |
| Silica |
| Other powder |
| Efficient shelling machine |
| Other post-harvest activity |
| 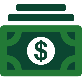 | Commercialization | Direct sale |
| Intermediary |
| Other type of sales |
| 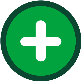 | Other activities | Multi-use/crop machinery for conservation agriculture |
| Multi-use/crop machinery for conventional agriculture |
| Milpa system with fruit trees |
| Contract agriculture |
| Filtering dams |
| Living barriers |
| Dams |
| Contreo |
| Other conservation task |
| Crop rotation |
| Other activity (describe in comment section) |

Note: The list is shown as an example since the tasks and activities are preset by CIMMYT, as these are already used for plots with ongoing sustainable intensification projects. AgroTutor can be adapted to incorporate and display a completely different set of tasks and activities better adapted to reflect local context and knowledge.
