# Supplementary material
Source: Preprints.org preprint supplement (doi:10.20944/preprints202008.0497.v1)
Supplement: Supplementary file 2 [file Table S2 v2.docx]

**Table S2.** Potential and current contributions of AgroTutor to the SDGs (based on Fraisl et al., 2020; Fritz et al., 2019 and authors’ interpretations)

| **SDG Goal** | **Target** | **Indicator** | **Measure, monitor & evaluate** | **Implement** |
| --- | --- | --- | --- | --- |
| Goal 1. End poverty in all its forms everywhere | 1.2 By 2030, reduce at least by half the proportion of men, women and children of all ages living in poverty in all its dimensions according to national definitions | 1.2.2 Proportion of men, women and children of all ages living in poverty in all  its dimensions according to national definitions. | **o** | **o** |
| Goal 2. End hunger, achieve food security and improved nutrition and promote sustainable agriculture | 2.4 By 2030, ensure sustainable food production systems and implement resilient agricultural practices that increase productivity and production, that help maintain ecosystems, that strengthen capacity for adaptation to climate change, extreme weather, drought, flooding and other disasters and that progressively improve land and soil quality | 2.4.1 Proportion of agricultural area under productive and sustainable agriculture | **x** | **x** |
| Goal 4. Ensure inclusive and equitable quality education and promote lifelong learning opportunities for all | 4.4 By 2030, substantially increase the number of youth and adults who have relevant skills, including technical and vocational skills, for employment, decent jobs and entrepreneurship | 4.4.1 Proportion of youth and adults with information and communications technology (ICT) skills | **o** |  |
| Goal 5. Achieve gender equality and empower all women and girls | 5.a Undertake reforms to give women equal rights to economic resources, as well as access to ownership and control over land and other forms of property, financial services, inheritance and  natural resources, in accordance with national laws | 5.a (b) Share of women among owners or rights-bearers of agricultural land, by type of tenure | **o** |  |
| Goal 12. Ensure sustainable consumption and production patterns | 12.3 By 2030, halve per capita global food waste at the retail and consumer levels and reduce food losses along production and supply chains, including post-harvest losses | 12.3.1 (b) Food waste index | **o** | **o** |
| Goal 13. Take urgent action to combat climate change and its impacts | 13.1 Strengthen resilience and adaptive capacity to climate-related hazards and natural disasters in all countries |  |  | **o** |

Note: **x**= already contributing, **o**= potential contribution
